# Supplementary material
Source: PubMed Central journal article supplement (PMC2291110)
Supplement: pnas_0800587105_9.pdf [file pnas_0800587105_9.pdf]

**Table 2. SGX393 single-agent cell-based mutagenesis assays**

| [SGX393] | Total wells analyzed | Sequenced clones (KD mutant clones) | Mutation(s)    | # Occurrences | Frequency by mutation (%) | Fraction of mutated sequences (%) | Residue        | Frequency by residue (%) | Fraction of mutated residues (%) |
|----------|----------------------|-------------------------------------|----------------|---------------|---------------------------|-----------------------------------|----------------|--------------------------|----------------------------------|
| 120nM    | 192                  | n=48 (21)                           | Native Bcr-Abl | 27            | 56.3                      | ---                               | Native Bcr-Abl | 56.3                     | ---                              |
|          |                      |                                     | L248R          | 1             | 2.1                       | 4.8                               | 248            | 2.1                      | 4.8                              |
|          |                      |                                     | G250E          | 2             | 4.2                       | 9.5                               | 250            | 6.3                      | 14.3                             |
|          |                      |                                     | G250W          | 1             | 2.1                       | 4.8                               |                |                          |                                  |
|          |                      |                                     | Y253F          | 3             | 6.3                       | 14.3                              |                |                          |                                  |
|          |                      |                                     | Y253H          | 1             | 2.1                       | 4.8                               |                |                          |                                  |
|          |                      |                                     | Y253N          | 1             | 2.1                       | 4.8                               | 253            | 10.4                     | 23.8                             |
|          |                      |                                     | E255K          | 2             | 4.2                       | 9.5                               |                |                          |                                  |
|          |                      |                                     | E255V          | 2             | 4.2                       | 9.5                               |                |                          |                                  |
|          |                      |                                     | F311I          | 1             | 2.1                       | 4.8                               | 311            | 2.1                      | 4.8                              |
|          |                      |                                     | F317C          | 1             | 2.1                       | 4.8                               |                |                          |                                  |
|          |                      |                                     | F317I          | 2             | 4.2                       | 9.5                               | 317            | 14.6                     | 33.3                             |
|          |                      |                                     | F317L          | 2             | 4.2                       | 9.5                               |                |                          |                                  |
|          |                      |                                     | F317V          | 2             | 4.2                       | 9.5                               |                |                          |                                  |
| F317V    | 2                    | 4.2                                 | 9.5            |               |                           |                                   |                |                          |                                  |
| 240nM    | 480                  | n=243 (204)                         | Native Bcr-Abl | 39            | 16.0                      | ---                               | Native Bcr-Abl | 16.0                     | ---                              |
|          |                      |                                     | L248M          | 1             | 0.4                       | 0.5                               | 248            | 2.5                      | 2.9                              |
|          |                      |                                     | L248R          | 4             | 1.6                       | 2.0                               |                |                          |                                  |
|          |                      |                                     | L248V          | 1             | 0.4                       | 0.5                               |                |                          |                                  |
|          |                      |                                     | G249D          | 2             | 0.8                       | 1.0                               | 249            | 0.8                      | 1.0                              |
|          |                      |                                     | G250E          | 47            | 19.3                      | 23.0                              |                |                          |                                  |
|          |                      |                                     | Q252E          | 1             | 0.4                       | 0.5                               | 250            | 19.3                     | 23.0                             |
|          |                      |                                     | Q252H          | 4             | 1.6                       | 2.0                               |                |                          |                                  |
|          |                      |                                     | Y253C          | 3             | 1.2                       | 1.5                               | 252            | 2.1                      | 2.5                              |
|          |                      |                                     | Y253F          | 9             | 3.7                       | 4.4                               |                |                          |                                  |
|          |                      |                                     | Y253H          | 19            | 7.8                       | 9.3                               |                |                          |                                  |
|          |                      |                                     | Y253N          | 6             | 2.5                       | 2.9                               |                |                          |                                  |
|          |                      |                                     | E255K          | 13            | 5.3                       | 6.4                               | 253            | 15.2                     | 18.1                             |
|          |                      |                                     | E255V          | 9             | 3.7                       | 4.4                               |                |                          |                                  |
|          |                      |                                     | E258K          | 4             | 1.6                       | 2.0                               |                |                          |                                  |
|          |                      |                                     | F311I          | 6             | 2.5                       | 2.9                               | 255            | 9.1                      | 10.8                             |
|          |                      |                                     | F317C          | 5             | 2.1                       | 2.5                               |                |                          |                                  |
|          |                      |                                     | F317I          | 9             | 3.7                       | 4.4                               | 258            | 1.6                      | 2.0                              |
|          |                      |                                     | F317L          | 22            | 9.1                       | 10.8                              |                |                          |                                  |
|          |                      |                                     | F317S          | 2             | 0.8                       | 1.0                               | 311            | 2.5                      | 2.9                              |
|          |                      |                                     | F317V          | 34            | 14.0                      | 16.7                              |                |                          |                                  |
|          |                      |                                     | N322K          | 1             | 0.4                       | 0.5                               | 317            | 29.6                     | 35.3                             |
|          |                      |                                     | E355G          | 1             | 0.4                       | 0.5                               |                |                          |                                  |
| S417Y    | 1                    | 0.4                                 | 0.5            |               |                           |                                   |                |                          |                                  |
| 480nM    | 288                  | n=90 (89)                           | Native Bcr-Abl | 1             | 1.1                       | ---                               | Native Bcr-Abl | 1.1                      | ---                              |
|          |                      |                                     | L248M          | 1             | 1.1                       | 1.1                               | 248            | 6.7                      | 6.7                              |
|          |                      |                                     | L248Q          | 3             | 3.3                       | 3.4                               |                |                          |                                  |
|          |                      |                                     | L248R          | 2             | 2.2                       | 2.2                               |                |                          |                                  |
|          |                      |                                     | G249D          | 2             | 2.2                       | 2.2                               | 249            | 2.2                      | 2.2                              |
|          |                      |                                     | G250E          | 20            | 22.2                      | 22.5                              |                |                          |                                  |
|          |                      |                                     | G250V          | 4             | 4.4                       | 4.5                               | 250            | 26.7                     | 27.0                             |
|          |                      |                                     | Q252H          | 5             | 5.6                       | 5.6                               |                |                          |                                  |
|          |                      |                                     | Y253F          | 4             | 4.4                       | 4.5                               | 252            | 5.6                      | 5.6                              |
|          |                      |                                     | Y253H          | 6             | 6.7                       | 6.7                               |                |                          |                                  |
|          |                      |                                     | Y253N          | 4             | 4.4                       | 4.5                               | 253            | 15.6                     | 15.7                             |
|          |                      |                                     | E255K          | 1             | 1.1                       | 1.1                               |                |                          |                                  |
|          |                      |                                     | E255V          | 4             | 4.4                       | 4.5                               |                |                          |                                  |
|          |                      |                                     | F317C          | 5             | 5.6                       | 5.6                               | 255            | 5.6                      | 5.6                              |
|          |                      |                                     | F317I          | 3             | 3.3                       | 3.4                               |                |                          |                                  |
|          |                      |                                     | F317L          | 7             | 7.8                       | 7.9                               | 317            | 36.7                     | 37.1                             |
|          |                      |                                     | F317V          | 18            | 20.0                      | 20.2                              |                |                          |                                  |
| F317V    | 18                   | 20.0                                | 20.2           |               |                           |                                   |                |                          |                                  |
| 960nM    | 288                  | n=56 (56)                           | Native Bcr-Abl | 0             | 0.0                       | ---                               | Native Bcr-Abl | 0.0                      | ---                              |
|          |                      |                                     | L248M          | 1             | 1.8                       | 1.8                               | 248            | 5.4                      | 5.4                              |
|          |                      |                                     | L248Q          | 1             | 1.8                       | 1.8                               |                |                          |                                  |
|          |                      |                                     | L248R          | 1             | 1.8                       | 1.8                               |                |                          |                                  |
|          |                      |                                     | G250E          | 8             | 14.3                      | 14.3                              | 250            | 14.3                     | 14.3                             |
|          |                      |                                     | Q252H          | 3             | 5.4                       | 5.4                               |                |                          |                                  |
|          |                      |                                     | Y253F          | 4             | 7.1                       | 7.1                               | 252            | 5.4                      | 5.4                              |
|          |                      |                                     | Y253N          | 2             | 3.6                       | 3.6                               |                |                          |                                  |
|          |                      |                                     | E255V          | 2             | 3.6                       | 3.6                               | 253            | 10.7                     | 10.7                             |
|          |                      |                                     | F317C          | 2             | 3.6                       | 3.6                               |                |                          |                                  |
|          |                      |                                     | F317L          | 3             | 5.4                       | 5.4                               | 255            | 3.6                      | 3.6                              |
|          |                      |                                     | F317S          | 1             | 1.8                       | 1.8                               |                |                          |                                  |
|          |                      |                                     | F317V          | 28            | 50.0                      | 50.0                              | 317            | 60.7                     | 60.7                             |
|          |                      |                                     | F317V          | 28            | 50.0                      | 50.0                              |                |                          |                                  |
| F317V    | 28                   | 50.0                                | 50.0           |               |                           |                                   |                |                          |                                  |
| 1920nM   | 288                  | n=26 (26)                           | Native Bcr-Abl | 0             | 0.0                       | ---                               | Native Bcr-Abl | 0.0                      | ---                              |
|          |                      |                                     | L248R          | 2             | 7.7                       | 7.7                               | 248            | 7.7                      | 7.7                              |
|          |                      |                                     | G250E          | 7             | 26.9                      | 26.9                              |                |                          |                                  |
|          |                      |                                     | Y253F          | 4             | 15.4                      | 15.4                              | 250            | 26.9                     | 26.9                             |
|          |                      |                                     | E255V          | 2             | 7.7                       | 7.7                               |                |                          |                                  |
|          |                      |                                     | F317V          | 11            | 42.3                      | 42.3                              | 253            | 15.4                     | 15.4                             |
|          |                      |                                     | F317V          | 11            | 42.3                      | 42.3                              |                |                          |                                  |

NOTE: n values for each SGX393 concentration refer to the total number of sequenced clones. Numbers in parentheses that follow refer to the number of clones carrying mutant Bcr-Abl.
