# Supplementary material
Source: PubMed Central journal article supplement (PMC2291110)
Supplement: pnas_0800587105_11.pdf [file pnas_0800587105_11.pdf]

**Table 4. SGX393-imatinib combination mutagenesis study**

|                                |            | Total wells<br>(sequenced clones) | Mutation<br>recovered | Number of<br>occurrences | Frequency (%)  | Mutations recovered<br>(by residue) | Frequency (by<br>residue) (%) |                |      |                |      |                |      |     |                |
|--------------------------------|------------|-----------------------------------|-----------------------|--------------------------|----------------|-------------------------------------|-------------------------------|----------------|------|----------------|------|----------------|------|-----|----------------|
| SGX393 + imatinib combinations |            |                                   |                       |                          |                |                                     |                               |                |      |                |      |                |      |     |                |
| [SGX393]                       | [imatinib] |                                   |                       |                          |                |                                     |                               |                |      |                |      |                |      |     |                |
| 240nM                          | 2000nM     | 96 (n=46)                         | Native Bcr-Abl        | 0                        | 0.0            | Native Bcr-Abl                      | 0.0                           |                |      |                |      |                |      |     |                |
|                                |            |                                   | L248R                 | 2                        | 4.3            |                                     |                               | 248            | 6.5  |                |      |                |      |     |                |
|                                |            |                                   | L248V                 | 1                        | 2.2            |                                     |                               |                |      |                |      |                |      |     |                |
|                                |            |                                   | G250E                 | 12                       | 26.1           |                                     |                               |                |      | 250            | 26.1 |                |      |     |                |
|                                |            |                                   | Q252H                 | 3                        | 6.5            |                                     |                               |                |      |                |      |                |      |     |                |
|                                |            |                                   | Y253C                 | 1                        | 2.2            |                                     |                               |                |      |                |      |                |      |     |                |
|                                |            |                                   | Y253F                 | 4                        | 8.7            |                                     |                               |                |      |                |      |                |      |     |                |
|                                |            |                                   | Y253H                 | 14                       | 30.4           |                                     |                               |                |      |                |      | 253            | 50.0 |     |                |
|                                |            |                                   | Y253N                 | 4                        | 8.7            |                                     |                               |                |      |                |      |                |      |     |                |
|                                |            |                                   | E255K                 | 1                        | 2.2            |                                     |                               |                |      |                |      |                |      |     |                |
|                                |            |                                   | E255V                 | 3                        | 6.5            |                                     |                               |                |      |                |      | 255            | 8.7  |     |                |
| F317L                          | 1          | 2.2                               | 317                   | 2.2                      |                |                                     |                               |                |      |                |      |                |      |     |                |
| 240nM                          | 4000nM     | 96 (n=9)                          |                       |                          | Native Bcr-Abl | 0                                   | 0.0                           | Native Bcr-Abl | 0.0  |                |      |                |      |     |                |
|                                |            |                                   | L248Q                 | 1                        | 11.1           | 248                                 | 11.1                          |                |      |                |      |                |      |     |                |
|                                |            |                                   | G250E                 | 4                        | 44.4           |                                     |                               |                |      | 250            | 44.4 |                |      |     |                |
|                                |            |                                   | Y253F                 | 1                        | 11.1           |                                     |                               |                |      |                |      |                |      |     |                |
|                                |            |                                   | Y253H                 | 2                        | 22.2           |                                     |                               |                |      |                |      | 253            | 33   |     |                |
|                                |            |                                   | E255K                 | 1                        | 11.1           |                                     |                               |                |      |                |      |                |      | 255 | 11.1           |
| 480nM                          | 2000nM     | 288 (n=76)                        | Native Bcr-Abl        | 0                        | 0.0            | Native Bcr-Abl                      | 0.0                           |                |      |                |      |                |      |     |                |
|                                |            |                                   | L248K                 | 1                        | 1.3            |                                     |                               | 248            | 10.5 |                |      |                |      |     |                |
|                                |            |                                   | L248Q                 | 3                        | 3.9            |                                     |                               |                |      |                |      |                |      |     |                |
|                                |            |                                   | L248R                 | 4                        | 5.3            |                                     |                               |                |      |                |      |                |      |     |                |
|                                |            |                                   | G250A                 | 1                        | 1.3            |                                     |                               |                |      | 250            | 25.0 |                |      |     |                |
|                                |            |                                   | G250E                 | 18                       | 23.7           |                                     |                               |                |      |                |      |                |      |     |                |
|                                |            |                                   | Q252H                 | 5                        | 6.6            |                                     |                               |                |      |                |      | 252            | 6.6  |     |                |
|                                |            |                                   | Y253F                 | 13                       | 17.1           |                                     |                               |                |      |                |      |                |      |     |                |
|                                |            |                                   | Y253H                 | 16                       | 21.1           |                                     |                               |                |      |                |      | 253            | 38.2 |     |                |
|                                |            |                                   | E255V                 | 14                       | 18.4           |                                     |                               |                |      | 255            | 18.4 |                |      |     |                |
|                                |            |                                   | F317L                 | 1                        | 1.3            |                                     |                               |                |      |                |      | 317            | 1.3  |     |                |
| 480nM                          | 4000nM     | 288 (n=42)                        | Native Bcr-Abl        | 0                        | 0.0            | Native Bcr-Abl                      | 0.0                           |                |      |                |      |                |      |     |                |
|                                |            |                                   | L248R                 | 6                        | 14.3           |                                     |                               | 248            | 14.3 |                |      |                |      |     |                |
|                                |            |                                   | G250E                 | 10                       | 23.8           |                                     |                               |                |      | 250            | 23.8 |                |      |     |                |
|                                |            |                                   | Q252H                 | 2                        | 4.8            |                                     |                               |                |      |                |      | 252            | 4.8  |     |                |
|                                |            |                                   | Y253F                 | 8                        | 19.0           |                                     |                               |                |      |                |      |                |      |     |                |
|                                |            |                                   | Y253H                 | 6                        | 14.3           |                                     |                               |                |      |                |      | 253            | 33.3 |     |                |
|                                |            |                                   | E255V                 | 9                        | 21.4           |                                     |                               |                |      |                |      |                |      | 255 | 21.4           |
|                                |            |                                   | F317I                 | 1                        | 2.4            |                                     |                               |                |      |                |      |                |      |     |                |
|                                |            |                                   | 960nM                 | 2000nM                   | 288 (n=27)     |                                     |                               |                |      |                |      | Native Bcr-Abl | 0    | 0.0 | Native Bcr-Abl |
| L248K                          | 1          | 3.7                               |                       |                          |                | 248                                 | 22.2                          |                |      |                |      |                |      |     |                |
| L248R                          | 5          | 18.5                              |                       |                          |                |                                     |                               |                |      |                |      |                |      |     |                |
| G250E                          | 4          | 14.8                              |                       |                          |                |                                     |                               | 250            | 14.8 |                |      |                |      |     |                |
| Y253F                          | 9          | 33.3                              |                       |                          |                |                                     |                               |                |      | 253            | 33.3 |                |      |     |                |
| E255V                          | 8          | 29.6                              |                       |                          |                |                                     |                               | 255            | 29.6 |                |      |                |      |     |                |
| 960nM                          | 4000nM     | 288 (n=19)                        | Native Bcr-Abl        | 0                        | 0.0            | Native Bcr-Abl                      | 0.0                           |                |      |                |      |                |      |     |                |
|                                |            |                                   | L248K                 | 2                        | 10.5           |                                     |                               | 248            | 26.3 |                |      |                |      |     |                |
|                                |            |                                   | L248R                 | 3                        | 15.8           |                                     |                               |                |      |                |      |                |      |     |                |
|                                |            |                                   | G250E                 | 1                        | 5.3            |                                     |                               |                |      | 250            | 5.3  |                |      |     |                |
|                                |            |                                   | Q252H                 | 1                        | 5.3            |                                     |                               |                |      |                |      | 252            | 5.3  |     |                |
|                                |            |                                   | Y253F                 | 4                        | 21.1           |                                     |                               |                |      | 253            | 21.1 |                |      |     |                |
|                                |            |                                   | E255V                 | 8                        | 42.1           |                                     |                               |                |      |                |      | 255            | 42.1 |     |                |
|                                |            |                                   | 1920nM                | 2000nM                   | 288 (n=6)      |                                     |                               |                |      | Native Bcr-Abl | 0    |                |      | 0.0 | Native Bcr-Abl |
| L248K                          | 1          | 16.7                              |                       |                          |                | 248                                 | 16.7                          |                |      |                |      |                |      |     |                |
| E255V                          | 5          | 83.3                              |                       |                          |                |                                     |                               | 255            | 83.3 |                |      |                |      |     |                |
| 1920nM                         | 4000nM     | 288 (n=8)                         | Native Bcr-Abl        | 0                        | 0.0            | Native Bcr-Abl                      | 0.0                           |                |      |                |      |                |      |     |                |
|                                |            |                                   | L248R                 | 4                        | 50.0           |                                     |                               | 248            | 50.0 |                |      |                |      |     |                |
|                                |            |                                   | E255V                 | 4                        | 50.0           |                                     |                               |                |      | 255            | 50.0 |                |      |     |                |
