# Supplementary material
Source: PubMed Central journal article supplement (PMC2291110)
Supplement: pnas_0800587105_12.pdf [file pnas_0800587105_12.pdf]

**Table 5. SGX393-nilotinib combination mutagenesis study**

|                                 |             | Total wells<br>(sequenced clones) | Mutation<br>recovered | Number of<br>occurrences | Frequency (%) | Mutations recovered<br>(by residue) | Frequency (by<br>residue) (%) |
|---------------------------------|-------------|-----------------------------------|-----------------------|--------------------------|---------------|-------------------------------------|-------------------------------|
| SGX393 + nilotinib combinations |             |                                   |                       |                          |               |                                     |                               |
| [SGX393]                        | [nilotinib] |                                   |                       |                          |               |                                     |                               |
| 240nM                           | 250nM       | 96 (n=3)                          | Native Bcr-Abl        | 0                        | 0.0           | Native Bcr-Abl                      | 0.0                           |
|                                 |             |                                   | Y253H                 | 2                        | 66.7          | 253                                 | 66.7                          |
|                                 |             |                                   | E255V                 | 1                        | 33.3          | 255                                 | 33.3                          |
| 240nM                           | 500nM       | 96 (n=1)                          | Native Bcr-Abl        | 0                        | 0.0           | Native Bcr-Abl                      | 0.0                           |
|                                 |             |                                   | L248R                 | 1                        | 100.0         | 248                                 | 100.0                         |
| 240nM                           | 1000nM      | 96 (n=0)                          | Native Bcr-Abl        | 0                        | 0.0           | Native Bcr-Abl                      | 0.0                           |
| 240nM                           | 2000nM      | 96 (n=0)                          | Native Bcr-Abl        | 0                        | 0.0           | Native Bcr-Abl                      | 0.0                           |
| 480nM                           | 250nM       | 288 (n=1)                         | Native Bcr-Abl        | 0                        | 0.0           | Native Bcr-Abl                      | 0.0                           |
|                                 |             |                                   | E255V                 | 1                        | 100.0         | 255                                 | 100.0                         |
| 480nM                           | 500nM       | 288 (n=5)                         | Native Bcr-Abl        | 0                        | 0.0           | Native Bcr-Abl                      | 0.0                           |
|                                 |             |                                   | L248R                 | 5                        | 100.0         | 248                                 | 100.0                         |
| 480nM                           | 1000nM      | 288 (n=0)                         | Native Bcr-Abl        | 0                        | 0.0           | Native Bcr-Abl                      | 0.0                           |
| 480nM                           | 2000nM      | 288 (n=0)                         | Native Bcr-Abl        | 0                        | 0.0           | Native Bcr-Abl                      | 0.0                           |
| 960nM                           | 250nM       | 288 (n=2)                         | Native Bcr-Abl        | 0                        | 0.0           | Native Bcr-Abl                      | 0.0                           |
|                                 |             |                                   | L248R                 | 2                        | 100.0         | 248                                 | 100.0                         |
| 960nM                           | 500nM       | 288 (n=2)                         | Native Bcr-Abl        | 0                        | 0.0           | Native Bcr-Abl                      | 0.0                           |
|                                 |             |                                   | L248R                 | 1                        | 50.0          | 248                                 | 50.0                          |
|                                 |             |                                   | E255V                 | 1                        | 50.0          | 255                                 | 50.0                          |
| 960nM                           | 1000nM      | 288 (n=0)                         | Native Bcr-Abl        | 0                        | 0.0           | Native Bcr-Abl                      | 0.0                           |
| 960nM                           | 2000nM      | 288 (n=0)                         | Native Bcr-Abl        | 0                        | 0.0           | Native Bcr-Abl                      | 0.0                           |
| 1920nM                          | 250nM       | 288 (n=0)                         | Native Bcr-Abl        | 0                        | 0.0           | Native Bcr-Abl                      | 0.0                           |
| 1920nM                          | 500nM       | 288 (n=0)                         | Native Bcr-Abl        | 0                        | 0.0           | Native Bcr-Abl                      | 0.0                           |
| 1920nM                          | 1000nM      | 288 (n=0)                         | Native Bcr-Abl        | 0                        | 0.0           | Native Bcr-Abl                      | 0.0                           |
| 1920nM                          | 2000nM      | 288 (n=0)                         | Native Bcr-Abl        | 0                        | 0.0           | Native Bcr-Abl                      | 0.0                           |
