# Supplementary material
Source: PubMed Central journal article supplement (PMC2291110)
Supplement: pnas_0800587105_13.pdf [file pnas_0800587105_13.pdf]

**Table 6. SGX393-dasatinib combination mutagenesis study**

| SGX393 + dasatinib combinations |             | Total wells<br>(sequenced clones) | Mutation<br>recovered | Number of<br>occurrences | Frequency (%) | Mutations recovered<br>(by residue) | Frequency (by<br>residue) (%) |
|---------------------------------|-------------|-----------------------------------|-----------------------|--------------------------|---------------|-------------------------------------|-------------------------------|
| [SGX393]                        | [dasatinib] |                                   |                       |                          |               |                                     |                               |
| 240nM                           | 5nM         | 96 (n=7)                          | Native Bcr-Abl        | 0                        | 0.0           | Native Bcr-Abl                      | 0.0                           |
|                                 |             |                                   | G250E                 | 2                        | 28.6          | 250                                 | 28.6                          |
|                                 |             |                                   | E255V                 | 1                        | 14.3          | 255                                 | 14.3                          |
|                                 |             |                                   | F317V                 | 4                        | 57.1          | 317                                 | 57.1                          |
| 240nM                           | 25nM        | 96 (n=5)                          | Native Bcr-Abl        | 0                        | 0.0           | Native Bcr-Abl                      | 0.0                           |
|                                 |             |                                   | F317V                 | 5                        | 100.0         | 317                                 | 100.0                         |
| 240nM                           | 100nM       | 96 (n=0)                          | Native Bcr-Abl        | 0                        | 0.0           | Native Bcr-Abl                      | 0.0                           |
| 240nM                           | 200nM       | 96 (n=0)                          | Native Bcr-Abl        | 0                        | 0.0           | Native Bcr-Abl                      | 0.0                           |
| 480nM                           | 5nM         | 288 (n=25)                        | Native Bcr-Abl        | 0                        | 0.0           | Native Bcr-Abl                      | 0.0                           |
|                                 |             |                                   | L248R                 | 2                        | 8.0           | 248                                 | 8.0                           |
|                                 |             |                                   | G250E                 | 4                        | 16.0          | 250                                 | 16.0                          |
|                                 |             |                                   | Q252H                 | 1                        | 4.0           | 252                                 | 4.0                           |
|                                 |             |                                   | E255V                 | 1                        | 4.0           | 255                                 | 4.0                           |
|                                 |             |                                   | F317I                 | 1                        | 4.0           |                                     |                               |
|                                 |             |                                   | F317L                 | 4                        | 16.0          | 317                                 | 68.0                          |
|                                 |             |                                   | F317V                 | 12                       | 48.0          |                                     |                               |
| 480nM                           | 25nM        | 288 (n=8)                         | Native Bcr-Abl        | 0                        | 0.0           | Native Bcr-Abl                      | 0.0                           |
|                                 |             |                                   | F317I                 | 1                        | 12.5          | 317                                 | 100.0                         |
|                                 |             |                                   | F317V                 | 7                        | 87.5          |                                     |                               |
| 480nM                           | 100nM       | 288 (n=0)                         | Native Bcr-Abl        | 0                        | 0.0           | Native Bcr-Abl                      | 0.0                           |
| 480nM                           | 200nM       | 288 (n=0)                         | Native Bcr-Abl        | 0                        | 0.0           | Native Bcr-Abl                      | 0.0                           |
| 960nM                           | 5nM         | 288 (n=16)                        | Native Bcr-Abl        | 0                        | 0.0           | Native Bcr-Abl                      | 0.0                           |
|                                 |             |                                   | G250E                 | 1                        | 6.3           | 250                                 | 6.3                           |
|                                 |             |                                   | E255V                 | 1                        | 6.3           | 255                                 | 6.3                           |
|                                 |             |                                   | F317C                 | 1                        | 6.3           |                                     |                               |
|                                 |             |                                   | F317L                 | 1                        | 6.3           | 317                                 | 87.5                          |
|                                 |             |                                   | F317V                 | 12                       | 75.0          |                                     |                               |
| 960nM                           | 25nM        | 288 (n=0)                         | Native Bcr-Abl        | 0                        | 0.0           | Native Bcr-Abl                      | 0.0                           |
| 960nM                           | 100nM       | 288 (n=0)                         | Native Bcr-Abl        | 0                        | 0.0           | Native Bcr-Abl                      | 0.0                           |
| 960nM                           | 200nM       | 288 (n=0)                         | Native Bcr-Abl        | 0                        | 0.0           | Native Bcr-Abl                      | 0.0                           |
| 1920nM                          | 5nM         | 288 (n=0)                         | Native Bcr-Abl        | 0                        | 0.0           | Native Bcr-Abl                      | 0.0                           |
| 1920nM                          | 25nM        | 288 (n=0)                         | Native Bcr-Abl        | 0                        | 0.0           | Native Bcr-Abl                      | 0.0                           |
| 1920nM                          | 100nM       | 288 (n=0)                         | Native Bcr-Abl        | 0                        | 0.0           | Native Bcr-Abl                      | 0.0                           |
| 1920nM                          | 200nM       | 288 (n=0)                         | Native Bcr-Abl        | 0                        | 0.0           | Native Bcr-Abl                      | 0.0                           |
