# Supplementary material
Source: PubMed Central journal article supplement (PMC2291110)

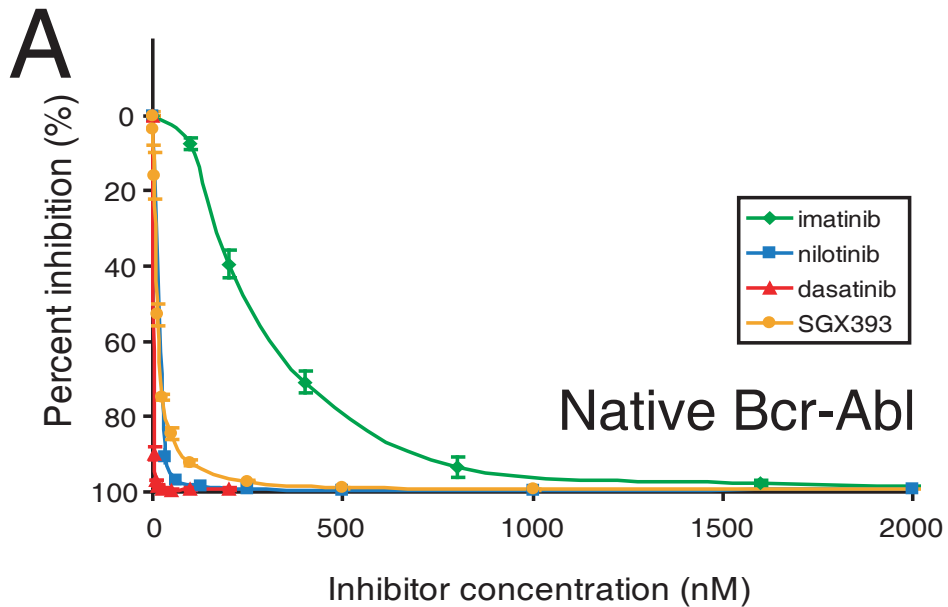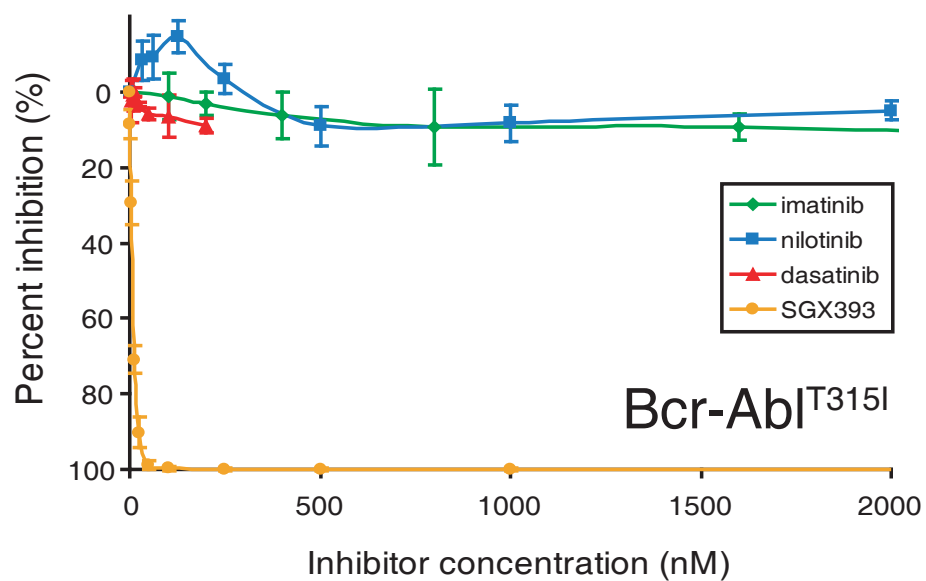

### B

Fold change in IC<sub>50</sub> compared to native Bcr-Abl

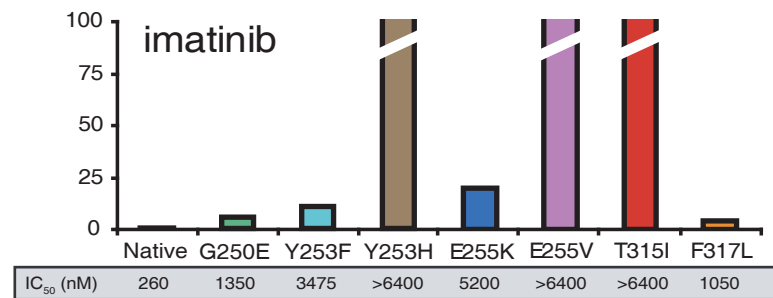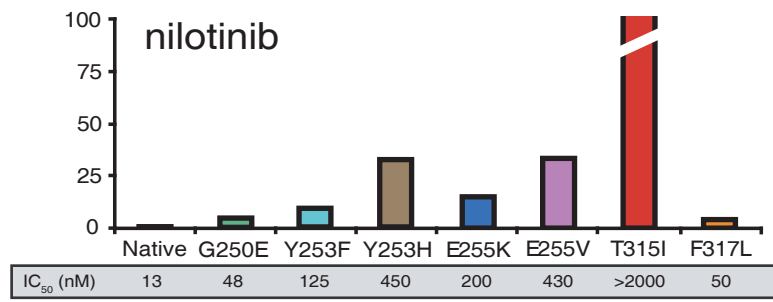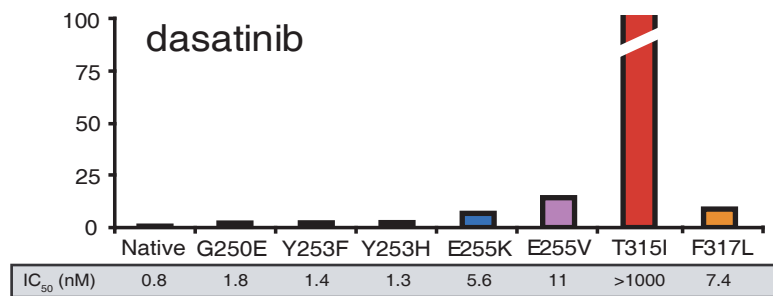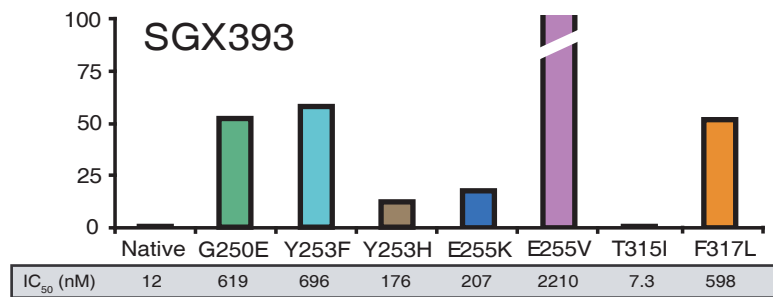

Supplement: pnas_0800587105_3.pdf [file pnas_0800587105_3.pdf]

Percent of NT colonies

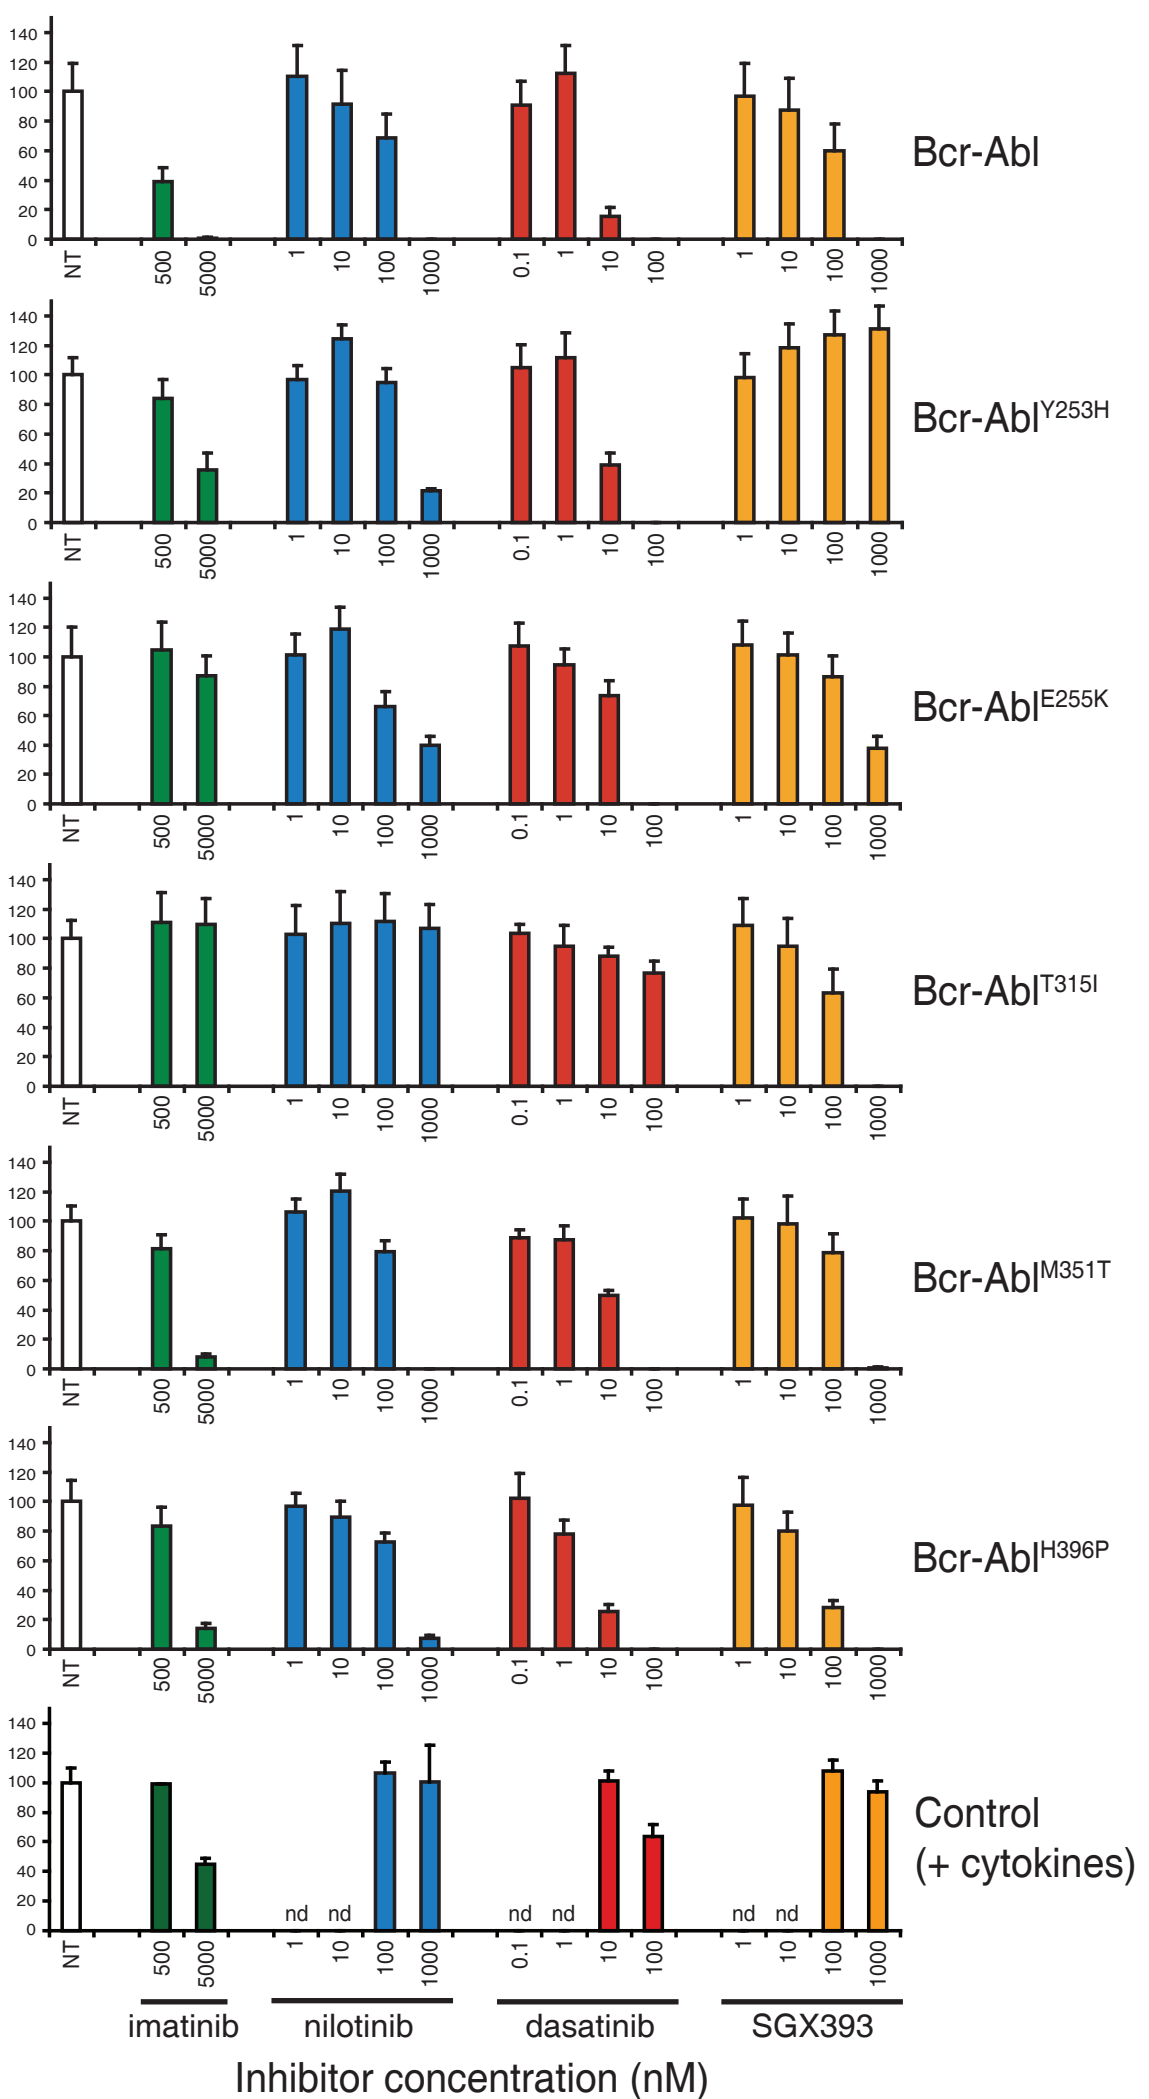

Supplement: pnas_0800587105_4.pdf [file pnas_0800587105_4.pdf]

**A****CML L-BC**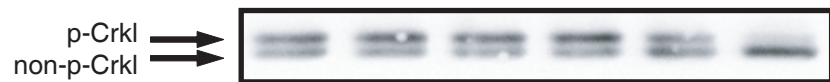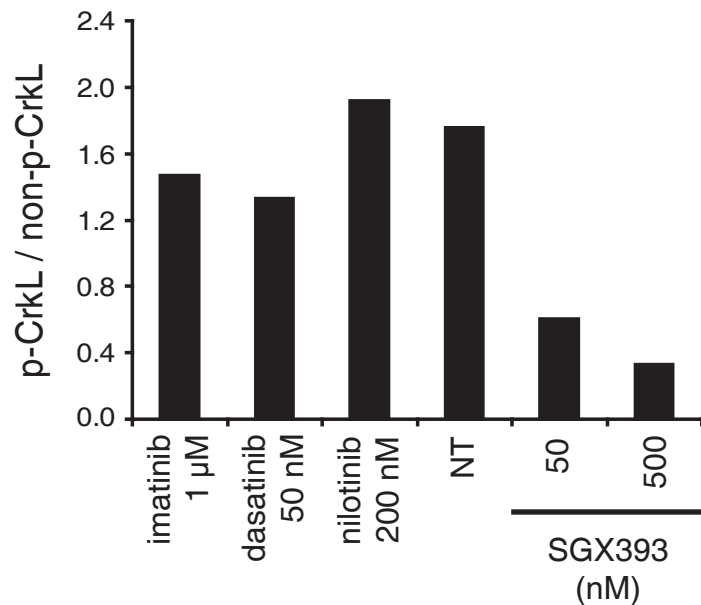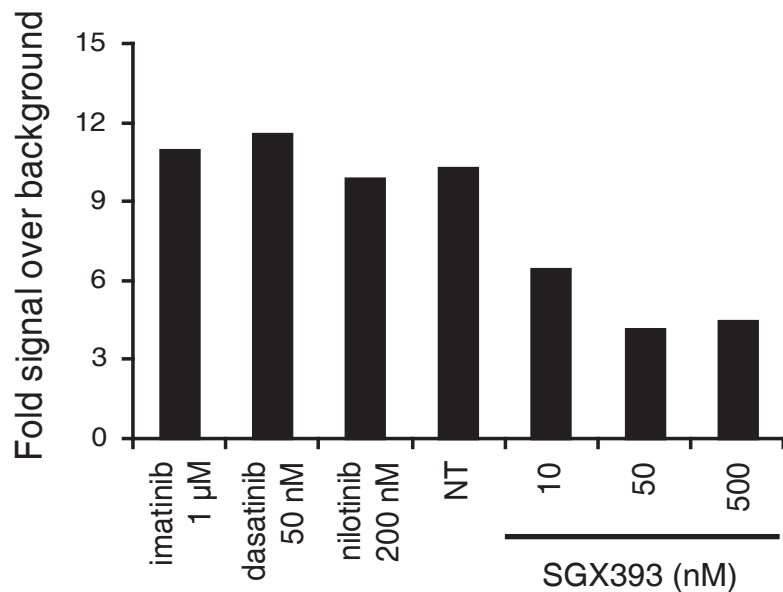**B****Ph+ ALL**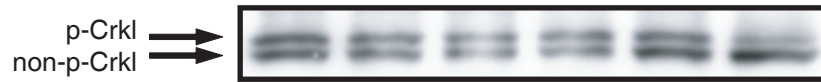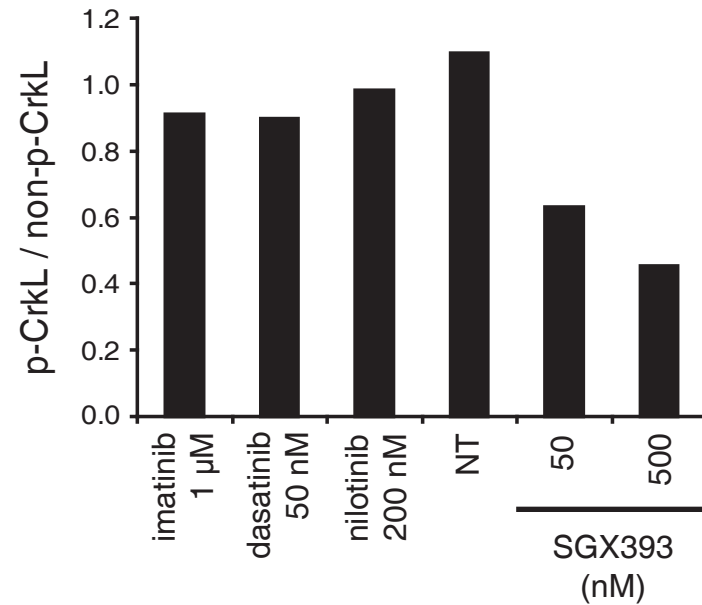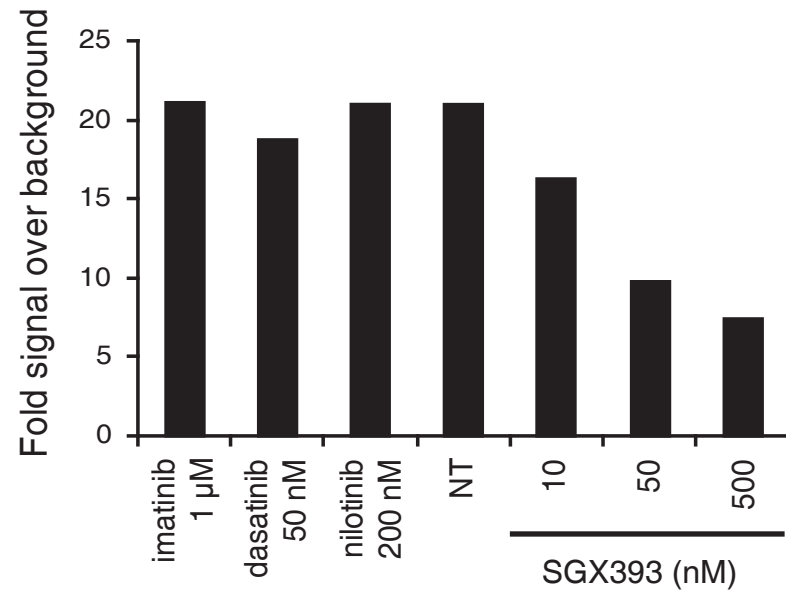

Supplement: pnas_0800587105_6.pdf [file pnas_0800587105_6.pdf]
